# Supplementary material
Source: Research Square preprint supplement (doi:10.21203/rs.3.rs-9032253/v1)
Supplement: Supplementary file 1 [file fc67822fc1527ac8d8c1f239.docx]

CARE Checklist Statement

This case report, describing a rare WHO Grade Ⅱ clear cell meningioma complicated with obstructive hydrocephalus and intratumoral hemorrhage in a 24-year-old primipara during late pregnancy, has been prepared in strict accordance with the CARE Guidelines (2016) for the transparent and comprehensive reporting of clinical cases. A fully completed CARE Checklist, with each item annotated with the corresponding line numbers in the manuscript (inapplicable items marked as N/A), has been uploaded as a supplementary file to this submission.

All core and mandatory elements stipulated in the CARE Checklist are comprehensively addressed in the manuscript, including the detailed clinical presentation of the patient with progressive headache, intractable vomiting and neurological deficits; complete imaging findings (cranial CT and MRI) of the intracranial tumor, hydrocephalus and intratumoral hemorrhage; the multidisciplinary team (MDT) formulated staged intervention strategy involving cesarean section followed by craniotomy; detailed histopathological and immunohistochemical results confirming the diagnosis of WHO Grade Ⅱ clear cell meningioma; short-term postoperative recovery and long-term follow-up outcomes of both the mother (1-year tumor-free survival) and the infant (normal growth and neurodevelopment); as well as a critical discussion on the potential mechanisms of tumor progression and intratumoral hemorrhage, and the optimal clinical management strategy for this rare pregnancy-associated neurological condition. We confirm that all content in the manuscript adheres to the reporting standards of the CARE Guidelines to ensure the reproducibility and clinical reference value of this case report.
